# Supplementary material for: High-Resolution Mutational Profiling Suggests the Genetic Validity of Glioblastoma Patient-Derived Pre-Clinical Models
Source: PLoS One. 2013 Feb 18;8(2):e56185. doi: 10.1371/journal.pone.0056185 (PMC3575368; doi:10.1371/journal.pone.0056185)
Supplement: Table S2 — Target Coverage Statistics. (XLSX) [file pone.0056185.s009.xlsx]

## Sheet: Sheet1
Table S2. Target Coverage Statistics
		Fraction of targeted bases
Samples1	Mean Target Cov.	≥ 2X	≥ 10X	≥ 20X	≥ 30X
SK01600 G	48.9399	0.841755	0.684824	0.584023	0.509586
SK01600 P	50.4619	0.830534	0.664142	0.559087	0.481982
SK01600 N	50.862	0.835762	0.671736	0.566899	0.490324
SK00115 G	82.7666	0.871746	0.744574	0.659278	0.600545
SK00115 P	62.689	0.852697	0.705045	0.608936	0.540903
SK00115 C	69.4031	0.835905	0.678518	0.586712	0.525404
SK00102 G	49.6499	0.83599	0.673352	0.572518	0.498776
SK00102 G*	49.0354	0.832649	0.668751	0.568129	0.494239
SK00102 P	46.3457	0.826027	0.654397	0.548686	0.469809
SK00102 P*	45.836	0.823077	0.650282	0.544522	0.465476
SK00102 X	51.4522	0.843871	0.685239	0.582328	0.505106
SK00102 X*	50.658	0.840051	0.679791	0.576783	0.499234
SK00072 G	53.4909	0.844538	0.691393	0.594743	0.524007
SK00072 G*	52.7766	0.841298	0.68682	0.590263	0.519318
SK00072 P	89.7965	0.876058	0.753561	0.668786	0.608763
SK00072 P*	88.6499	0.87325	0.748911	0.663913	0.604004
SK00072 X	56.7324	0.845104	0.689789	0.588096	0.512265
SK00072 X*	55.9922	0.841135	0.684024	0.582406	0.506498
1. G = germline, P = primary tumor, N = neurosphere, C = cell culture, X = xenograft, (*) after removing mouse reads
