# Supplementary material for: High-Resolution Mutational Profiling Suggests the Genetic Validity of Glioblastoma Patient-Derived Pre-Clinical Models
Source: PLoS One. 2013 Feb 18;8(2):e56185. doi: 10.1371/journal.pone.0056185 (PMC3575368; doi:10.1371/journal.pone.0056185)
Supplement: Table S4 — Distribution of the somatic variants by sample and class. (XLSX) [file pone.0056185.s011.xlsx]

## Sheet: Sheet1
Table S4. Distribution of the somatic variants by sample and class
Patient	SK01600		SK00115		SK00102				SK00072					All Primary tumors
Samples1	P	N	P	C	P	P*	X	X*	P	P*	X	X*
intergenic	27	21	31	36	39	40	31	29	25	21	42	31		122
intron	37	43	47	34	39	39	52	46	32	29	83	61		155
utrs	4	4	3	7	10	11	13	8	4	5	13	8		21
splice	1	2	3	0	1	2	2	2	0	0	2	1		5
coding-synonymous	39	36	34	39	31	26	137	30	25	25	221	41		129
in-frame indel	0	1	1	0	0	0	0	0	0	0	1	0		1
missense	53	69	72	72	66	65	99	82	43	40	103	74		234
frameshift	0	3	2	2	1	2	1	1	0	0	0	1		3
nonsense	4	5	3	4	4	4	3	3	1	1	3	3		12
total splice and non-synonymous	58	80	81	78	72	73	105	88	44	41	109	79	0	255
total	165	184	196	194	191	189	338	201	130	121	468	220	0	682
1. G = germline, P = primary tumor, N = neurosphere, C = cell culture, X = xenograft, (*) after removing mouse reads
