# Supplementary material for: High-Resolution Mutational Profiling Suggests the Genetic Validity of Glioblastoma Patient-Derived Pre-Clinical Models
Source: PLoS One. 2013 Feb 18;8(2):e56185. doi: 10.1371/journal.pone.0056185 (PMC3575368; doi:10.1371/journal.pone.0056185)
Supplement: Table S6 — Number of non-synonymous and splice-site somatic mutations identified in each patient in genes known to be mutated in glioma in the COSMIC database. (XLSX) [file pone.0056185.s013.xlsx]

## Sheet: Sheet1
Table S6: Number of non-synonymous and splice-site somatic mutations identified in each patient in genes known to be mutated in glioma in the COSMIC database.
Gene	SK01600	SK00072	SK00102	SK0115	Grand Total
ABCC3		1			1
ACAN	1				1
AGRN	1				1
ALPK2			1		1
ALX1				1	1
ARHGAP5	1				1
ATP12A				1	1
BCL6				1	1
BCOR				1	1
C6				1	1
CNTROB		1			1
COL4A5		1			1
CREBBP			1		1
DNAH6	1				1
EGFR	1				1
EIF4G2			1		1
EPC1			2		2
ESR1		1			1
FER1L6		1			1
GABRA6	1				1
GNAS				1	1
GPR98	1			1	2
GRIK4			1		1
GRLF1	1				1
HIVEP3	1				1
HSPG2		1			1
LAMA1	1				1
MARCO		1			1
MDGA1				1	1
MUC5AC				1	1
NCOA1	1				1
NRAS			1		1
NTRK3	1				1
NUP210L			1		1
OR4N2			1		1
PLXDC2				1	1
POLE		1			1
PTEN			2	1	3
RET				1	1
RYR2				1	1
SCN9A	1				1
SERPINA3				1	1
SHMT2				1	1
SLC38A4				1	1
SPTBN4				1	1
STX11			1		1
THBS1				1	1
TP53				3	3
TRIML2				1	1
TRIP11	1				1
TRRAP				1	1
TTN		1			1
ZNF366			1		1
Grand Total	14	9	13	23	59
