# Supplementary material for: High-Resolution Mutational Profiling Suggests the Genetic Validity of Glioblastoma Patient-Derived Pre-Clinical Models
Source: PLoS One. 2013 Feb 18;8(2):e56185. doi: 10.1371/journal.pone.0056185 (PMC3575368; doi:10.1371/journal.pone.0056185)
Supplement: Table S9 — Comparison of somatic mutations called in the primary tumor or in the tumor model. (XLSX) [file pone.0056185.s016.xlsx]

## Sheet: Sheet1
TableS9. Comparison of somatic mutations called in the primary tumor or in the tumor model
	Patients					Control Split Data1
	SK01600	SK00115	SK00102	SK00072		SK01600	SK00115	SK00072
Shared Constant	243	279	269	145		377	466	187
Shared Changing	4	3	20	42		0	2	11
Specific to Primary	6	7	4	3		5	10	9
Specfic to Model	6	8	6	23		2	2	73
Total (union of primary and model)	259	297	299	213		384	480	280
1. Split data were generated by comparing somatic mutation calls from 2 independent sequencing runs of the same sample.
