# Supplementary material for: High-Resolution Mutational Profiling Suggests the Genetic Validity of Glioblastoma Patient-Derived Pre-Clinical Models
Source: PLoS One. 2013 Feb 18;8(2):e56185. doi: 10.1371/journal.pone.0056185 (PMC3575368; doi:10.1371/journal.pone.0056185)
Supplement: Table S12 — Exome Capture Specificity. (XLSX) [file pone.0056185.s019.xlsx]

## Sheet: Sheet1
Table S12. Exome Capture Specificity
Samples1	Number of bp (Mb)
	On Bait	Near Bait (+/- 250bp)	Off Bait (>250bp)
SK01600 G	2355.83	1375.1	414.007
SK01600 P	2414.3	1336.2	333.204
SK01600 N	2439.49	1320.35	327.257
SK00115 G	4042.87	2119.5	1639.72
SK00115 P	3035.26	1569.3	620.65
SK00115 C	3335.63	1857.88	504.323
SK00102 G	2380.27	1274.96	336.805
SK00102 G*	2344.93	1254.26	288.582
SK00102 P	2213.3	1099.5	242.089
SK00102 P*	2183.86	1081.04	218.21
SK00102 X	2480.26	1487.74	413.953
SK00102 X*	2434.03	1456.2	344.329
SK00072 G	2576.86	1460.35	411.262
SK00072 G*	2535.26	1431.77	342.974
SK00072 P	4388.23	2499.89	696.549
SK00072 P*	4322.45	2450.39	609.948
SK00072 X	2733.09	1553.38	407.786
SK00072 X*	2688.26	1527.51	348.316
1. G = germline, P = primary tumor, N = neurosphere, C = cell culture, X = xenograft, (*) after removing mouse reads
